# Supplementary material
Source: PubMed Central journal article supplement (PMC5665836)
Supplement: rsif20170580supp8.pdf [file rsif20170580supp8.pdf]

**Table S1.** Mitral valve interstitial cell deformation (snapshots with strain). Mi, minor axis (micrometres); Ma, major axis (micrometres); AR, aspect ratio; C, cytoplasmic; N, nuclear; AVG, average; s.d., standard deviation.

| MVIC deformation |      | 0%    |      |      | 10%   |      |      | 20%   |      |      | 30%   |      |                    |
|------------------|------|-------|------|------|-------|------|------|-------|------|------|-------|------|--------------------|
|                  |      | Ma    | Mi   | AR                 |
| C                | AVG  | 11.46 | 4.68 | 2.46 | 15.09 | 4.07 | 3.68 | 14.18 | 2.56 | 5.68 | 27.50 | 2.45 | 11.10 <sup>a</sup> |
|                  | s.d. | 1.70  | 0.89 | 0.11 | 2.67  | 0.46 | 0.22 | 1.91  | 0.38 | 0.26 | 3.62  | 0.35 | 0.52               |
| N                | AVG  | 7.46  | 3.19 | 2.32 | 8.81  | 2.68 | 3.47 | 8.21  | 1.69 | 5.05 | 10.93 | 1.54 | 7.43 <sup>a</sup>  |
|                  | s.d. | 1.86  | 0.46 | 0.20 | 1.44  | 0.54 | 0.46 | 1.09  | 0.17 | 0.43 | 2.37  | 0.21 | 0.55               |

<sup>a</sup>Cytoplasmic AR is significantly higher than nuclear AR ( $p < 0.001$ ) at hyper-physiological strain levels.

**Table S2.** Fold regulation for static (0%) group. Only samples that are above or below the fold regulation threshold of 2 are shown.

| gene symbol | gene name                                                  | fold regulation |
|-------------|------------------------------------------------------------|-----------------|
| SELE        | Selectin E                                                 | 3.12            |
| MMP3        | MMP 13                                                     | 2.73            |
| SELP        | Selectin P                                                 | 2.73            |
| ICAM1       | Intracellular CAM 1                                        | 2.51            |
| MMP1        | MMP 1                                                      | 2.21            |
| VCAM1       | Vascular CAM 1                                             | 2.21            |
| ITGA2       | Integrin, alpha 2                                          | 2.08            |
| ADAMTS5     | ADAM metalloproteinase with thrombospondin type 1, motif 5 | −11.43          |
| MMP12       | MMP 12                                                     | −5.49           |
| MMP9        | MMP 9                                                      | −3.42           |
| ITGA8       | Integrin, alpha 8                                          | −3.32           |
| TNC         | Tenascin C                                                 | −2.59           |
| LOC397571   | Collagen, type I, alpha 1                                  | −2.48           |
| COL11A1     | Collagen, type XI, alpha 1                                 | −2.25           |
| LAMB3       | Laminin, Beta 1                                            | −2.25           |
| MMP16       | MMP 16                                                     | −2.19           |

**Table S3.** Fold regulation for the 20% strain group. Only samples that are above or below the fold regulation threshold of 2 are shown.

| gene symbol  | gene name                          | fold regulation |
|--------------|------------------------------------|-----------------|
| SELL         | Selectin L                         | 8.24            |
| LOC100156689 | Collagen, alpha-1 (XII) chain-like | 4.24            |
| SELP         | Selectin P                         | 3.79            |
| MMP8         | MMP 8                              | 3.73            |
| ITGA8        | Integrin, alpha 8                  | 3.36            |
| MMP15        | MMP 15                             | 3.05            |
| VCAN         | Versican                           | 2.90            |
| THBS2        | Thrombospondin-2-like              | 2.78            |
| VCAM1        | Vascular cell adhesion molecule 1  | 2.64            |
| CNTN1        | Contactin-1-like                   | 2.46            |
| LOC397571    | Collagen, type I, alpha 1          | 2.46            |
| SPP1         | Secreted phosphoprotein 1          | 2.34            |
| ICAM1        | Intracellular adhesion molecule-1  | 2.31            |
| VTN          | Vitronectin                        | 2.31            |
| ITGA5        | Integrin, alpha 5                  | 2.24            |
| LOC397459    | Integrin, alpha M                  | 2.21            |
| THBS1        | Thrombospondin 1                   | 2.19            |
| LOC100517053 | Integrin, alpha 3                  | 2.15            |
| CTNND1       | Catenin, delta 1                   | 2.14            |
| CTGF         | Connective tissue growth factor    | 2.14            |
| SGCE         | Sarcoglycan, epsilon               | 2.06            |
| HAPLN1       | Hyaluronan synthase 1              | 2.06            |
| COL5A1       | Collagen, type V, alpha 1          | 2.06            |
| ITGB2        | Integrin, beta 2                   | 2.02            |
| MMP14        | MMP 14                             | −10.99          |
| LAMA1        | Laminin, alpha 1                   | −2.28           |

**Table S4.** Fold regulation for the 30% strain group. Only samples that are above or below the fold regulation threshold of 2 are shown.

| gene symbol  | gene name                                                  | fold regulation |
|--------------|------------------------------------------------------------|-----------------|
| CTNND2       | Catenin (Cadherin-associated protein), delta 2             | 6.62            |
| LOC100156689 | Collagen alpha-1 (XII) chain-like                          | 5.90            |
| SELL         | Selectin L                                                 | 5.51            |
| VCAN         | Versican                                                   | 4.43            |
| ITGB5        | Integrin, beta 5                                           | 3.76            |
| ICAM1        | Intracellular adhesion molecule-1                          | 3.60            |
| COL8A1       | Collagen, type VIII, alpha 1                               | 3.54            |
| VCAM1        | Vascular cell adhesion molecule 1                          | 3.39            |
| ITGB2        | Integrin, beta 2                                           | 3.36            |
| B2M          | Beta-2-microglobulin                                       | 3.24            |
| THBS1        | Thrombospondin 1                                           | 3.16            |
| CNTN1        | Contactin-1-like                                           | 3.00            |
| ADAMTSS      | ADAM metalloproteinase with thrombospondin type 1 motif, 5 | 2.98            |
| MMP15        | MMP 15                                                     | 2.96            |
| LAMB1        | Laminin, beta 1                                            | 2.86            |
| CTGF         | Connective tissue growth factor                            | 2.73            |
| ITGA5        | Integrin, alpha 5                                          | 2.66            |
| CTNND1       | Catenin, delta 1                                           | 2.61            |
| THBS2        | Thrombospondin-2-like                                      | 2.59            |
| COL5A1       | Collagen, type V, alpha 1                                  | 2.58            |
| MMP2         | MMP 2                                                      | 2.39            |
| FBLN1        | Fibulin 1                                                  | 2.37            |
| ITGA4        | Integrin, alpha 4                                          | 2.33            |
| ITGB1        | Integrin, beta 1                                           | 2.32            |
| TIMP2        | TIMP metalloproteinase inhibitor 1                         | 2.28            |
| MMP9         | MMP 9                                                      | 2.26            |
| MMP14        | MMP 14                                                     | 2.24            |
| CTNNB1       | Catenin, beta 1, 88 kDa                                    | 2.22            |
| LOC397571    | Collagen, type I, alpha 1                                  | 2.20            |
| VTN          | Vitronectin                                                | 2.16            |
| SGCE         | Sarcoglycan, epsilon                                       | 2.10            |
| COL3A1       | Collagen, type III, alpha 1                                | 2.05            |
| LAMB3        | Laminin, Beta 1                                            | −3.24           |
